# Supplementary material
Source: Springer Nature journal article supplement (https://www.springermedizin.de/resource/supplementary/12885_2013_5236_MOESM3_ESM.pdf/9466250)

**A**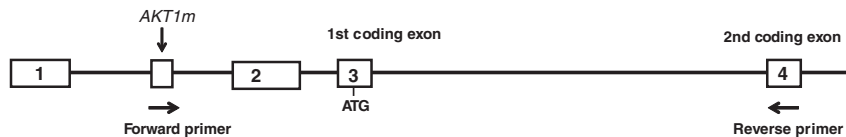**B**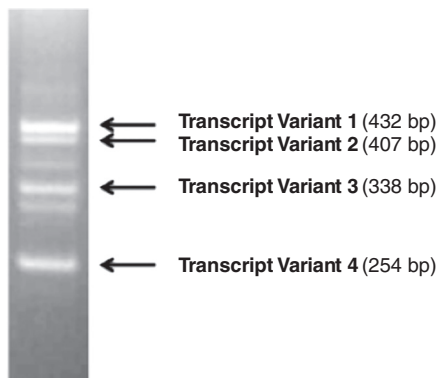**C**

### Human *AKT1* Transcripts from a novel exon (1m)

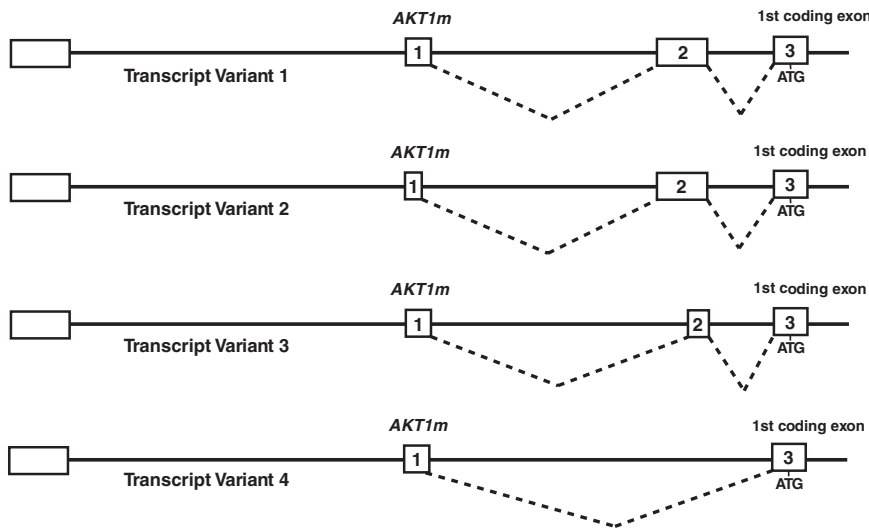

Supplement: MOESM3 [file 9466250]
